# Supplementary material for: RhoA Is a Crucial Regulator of Myoblast Fusion
Source: MDPI journal article supplement (doi:10.3390/cells12232673), 2023-11-21
Supplement: s1 [file s1]

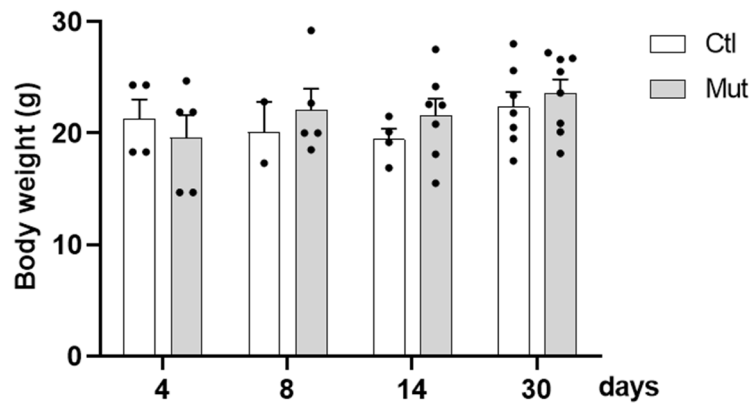

**Figure S1.** RhoA loss within SCs does not affect mice body weight. Body weight of Tam injected or not mice before, four, eight, fourteen and thirty days after CTX injection (n=2-8).

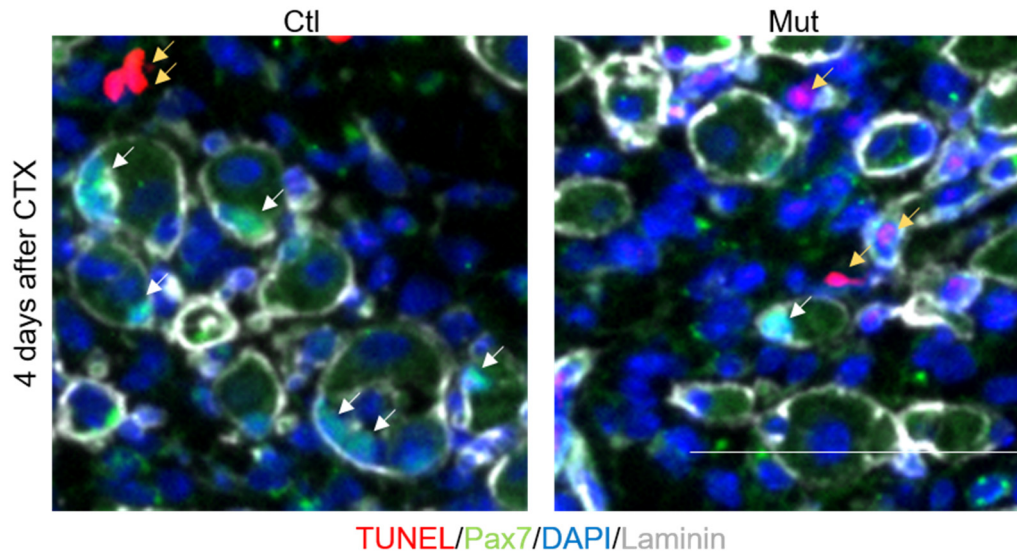

**Figure S2.** Reduced number of SCs in RhoA-deleted muscle is not due to their aberrant apoptosis. Representative image of *TA* muscle section of Tam or not injected mice immunostained for Pax7 (green), laminin (gray), TUNEL (red) and nuclear staining with DAPI four days after CTX injection. Scale bar 100 $\mu$ m.

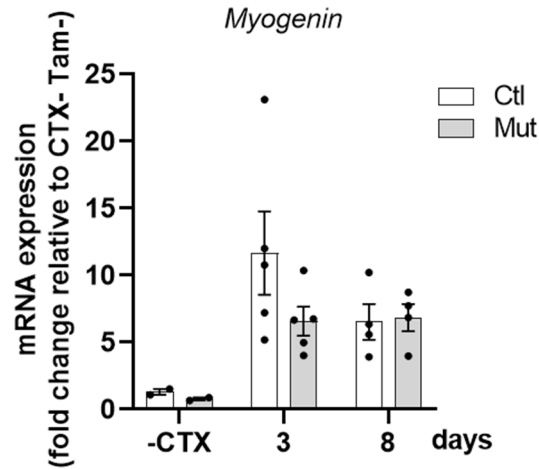

**Figure S3.** Adult muscle differentiation is not impaired with SCs RhoA deleted Analysis of *Myogenin* mRNA expression by RT-qPCR in Tam injected or not mice before, three and eight days after CTX injection (n=2-5).

**A**

| Symbol                            | Day0         |                  | Day1         |                  | Day3         |                  |
|-----------------------------------|--------------|------------------|--------------|------------------|--------------|------------------|
|                                   | Expr p-value | Expr Fold Change | Expr p-value | Expr Fold Change | Expr p-value | Expr Fold Change |
| <i>Chrd</i>                       | 3,22E-02     | -1,38            | 4,04E-02     | -1,357           | 4,08E-02     | -1,356           |
| <i>Olfir881</i>                   | 2,59E-02     | -1,102           | 3,30E-03     | -1,15            | 4,81E-02     | -1,088           |
| <i>C920021L13Rik</i>              | 1,55E-02     | 1,256            | 4,23E-02     | 1,202            | 2,53E-02     | 1,23             |
| <i>Ccdc180</i>                    | 1,08E-02     | 1,298            | 3,55E-02     | 1,227            | 4,49E-02     | 1,214            |
| <i>Dhrs2</i>                      | 1,88E-02     | 1,193            | 2,54E-02     | 1,18             | 2,48E-02     | 1,181            |
| <i>Fate1</i>                      | 1,03E-03     | 1,26             | 5,98E-03     | 1,196            | 4,92E-03     | 1,203            |
| <i>Rsl1 (includes others)</i>     | 1,76E-02     | 1,371            | 2,81E-02     | 1,332            | 9,15E-03     | 1,428            |
| <i>Pear1</i>                      | 1,87E-02     | 1,363            | 8,17E-03     | 1,434            | 1,49E-02     | 1,382            |
| <i>Esco1</i>                      | 3,73E-02     | 2,015            | 2,61E-02     | 2,135            | 2,21E-02     | 2,194            |
| <i>Gsdmc</i>                      | 1,70E-02     | 1,289            | 1,14E-03     | -1,239           | 3,69E-03     | -1,199           |
| <i>Ifna4</i>                      | 1,16E-02     | 1,216            | 1,60E-02     | 1,615            | 1,66E-02     | -1,198           |
| <i>Il12rb1</i>                    | 1,23E-02     | 1,151            | 2,09E-02     | -1,135           | 3,28E-02     | 1,122            |
| <i>Il1rb3</i>                     | 1,07E-02     | 1,201            | 4,27E-02     | -1,148           | 6,24E-03     | -1,223           |
| <i>Vmn1r192 (includes others)</i> | 3,38E-03     | -1,179           | 5,02E-03     | 1,229            | 1,83E-03     | -1,137           |
| <i>Vmn2r32 (includes others)</i>  | 1,32E-02     | 1,555            | 2,62E-02     | 1,289            | 1,42E-02     | -1,33            |
| <i>Adam20</i>                     | 2,16E-02     | -1,206           | 2,87E-02     | -1,106           | 1,74E-02     | 1,118            |
| <i>A1987944 (includes others)</i> | 8,46E-04     | -1,447           | 3,57E-02     | -1,955           | 2,63E-02     | 1,666            |

**B**

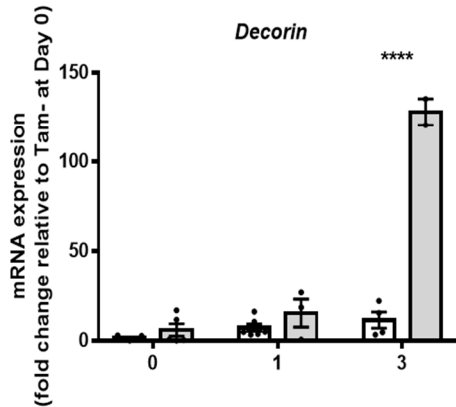

**C**

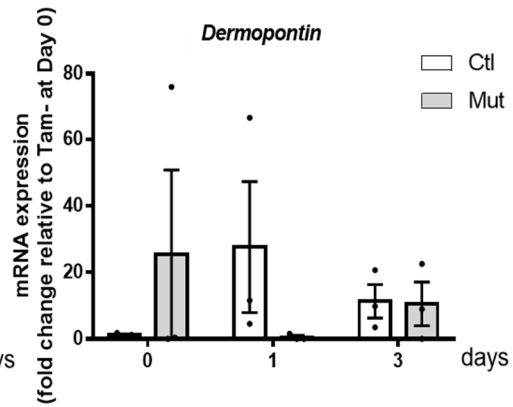

**Figure S4.** The absence of RhoA in SCs affects some expression genes. **(A)** Top 17 genes identified by IPA whose expression is RhoA dependent and is deregulated in all the differentiation state. **(B)** Analysis of *Decorin* (*Dcn*) and **(C)** *Dermopontin* (*Dpn*) mRNA expression by RT-qPCR in FACS-sorted SCs control or RhoA-deleted, cultured in rich medium (Day 0) or 1 (Day 1) and 3 (Day 3) after differentiation. Data were normalized by *Hmbs* expression and relative to Tam- at Day 0 (n=2-6). Means  $\pm$  SEM \*\*\*\*  $P < 0.0001$  (ordinary two-way ANOVA with Sidak's test).
